# Supplementary material for: Gender Differences in Adverse Events of Ketamine Drugs: A Real‐World Study Based on FAERS
Source: Hindawi journal article supplement (doi:10.1155/2024/4898082), 2024-01-01
Supplement: f1 [file 4898082.f1.doc]

| ’2-2-CHLOROPHENYL-2-METHYLAMINO CYCLOHEXANONE’,’CI-581’,’CI 581’,’CI581’,’KETALAR’,’KETASET’,’KETANEST’,’CALIPSOL’,’KALIPSOL’,’CALYPSOL’,’KETAMINE HYDROCHLORIDE’,’KETAMINE HCL’,’KETAMINE’,’ESKETAMINE’,’KETAMINE HYDROCHLORIDE’,’KETAMINE’,’KETAMINE’,’KETAMINE HYDROCHLORIDE INJECTION USP’,’KETAMINE HYDROCHLORIDE INJECTION’,’KETAMINE HYDROCHLORIDE INJECTION USP’,’BLINDED’,’ESKETAMINE’,’KETAMINE HYDROCHLORIDE’,’KETAMINE KETAMINE HCL 100MG ML INJ’,’KETAMINE 45MG SL TROCHE PROFE’,’KETAMINE HCL INJECTION’,’KETAMINE HYDROCHLORIDE 50MG 5ML’,’KETAMINE HCL KETAMINE’,’KETAMINE NASAL SPRAY IN MUCOLOX’,’KETAMINE INJECTION 10 MG ML’,’KETAMINE HYDROCLORIDE KETMINE HCL’,’KETAMINE HCL INJ USP’,’KETAMINE CAPSULE 100 MG 100 MG TOWN PHARMACY’,’KETAMINE 50MG ML JHP PHARMACEUTICALS’,’IV KETAMINE LOW DOSE’,’KETAMINE 100 MG ML MONARCH’,’KETAMINE HCL KETAMINE’,’KETAMINE HYDROCHLORIDE INJECTION’,’KETAMINE IV 200MG 20ML’,’KETAMINE SHOT’,’INTRANASAL KETAMINE’,’ KETAMINE HCL’,’KETAMINE UNKNOWN’,’KETAMINE 15 MG’,’KETAMINE 50MG 5ML INJECTION SYRINGE’,’KETAMINE 90 MG COMPOUNDED BY A PHARMACY’,’KETAMINE HCI INJ USP 500MG 10ML’,’KETAMINE HCL INJ 500MG 10ML-BEDFORD LABS INC’,’KETAMINE HCL KETAMINE’,’KETAMINE LOZENGES’,’KETAMINE OXYTOCIN’,’OXYTOCIN KETAMINE MUCOLOX NASAL SPRAY’,’NEURONTIN KETAMINE AMITRIPTYLINE’,’N-ETHYL DESCHLOROKETAMINE’,’AMITRIPTYLINE BACLOFEN BUPIVACAINE DICLOFENAC GABAPENTIN KETAMINE’,’BUPIVACAINE CYCLOBENZAPRINE FLUTICASONE GABAPENTIN KETAMINE KETOPROFEN’,’ESKETAMINE 28MG SOLN SPRAY NASAL’ |
| --- |

Table S1 Drug search names
